# Supplementary material for: Tumor-specific T cells support chemokine-driven spatial organization of intratumoral immune microaggregates needed for long survival
Source: HighWire-hosted journal article supplement (doi:10.1136/jitc-2021-004346), 2022-02-01
Supplement: jitc-2021-004346supp008_data_supplement.pdf [file jitc-2021-004346supp008_data_supplement.pdf]

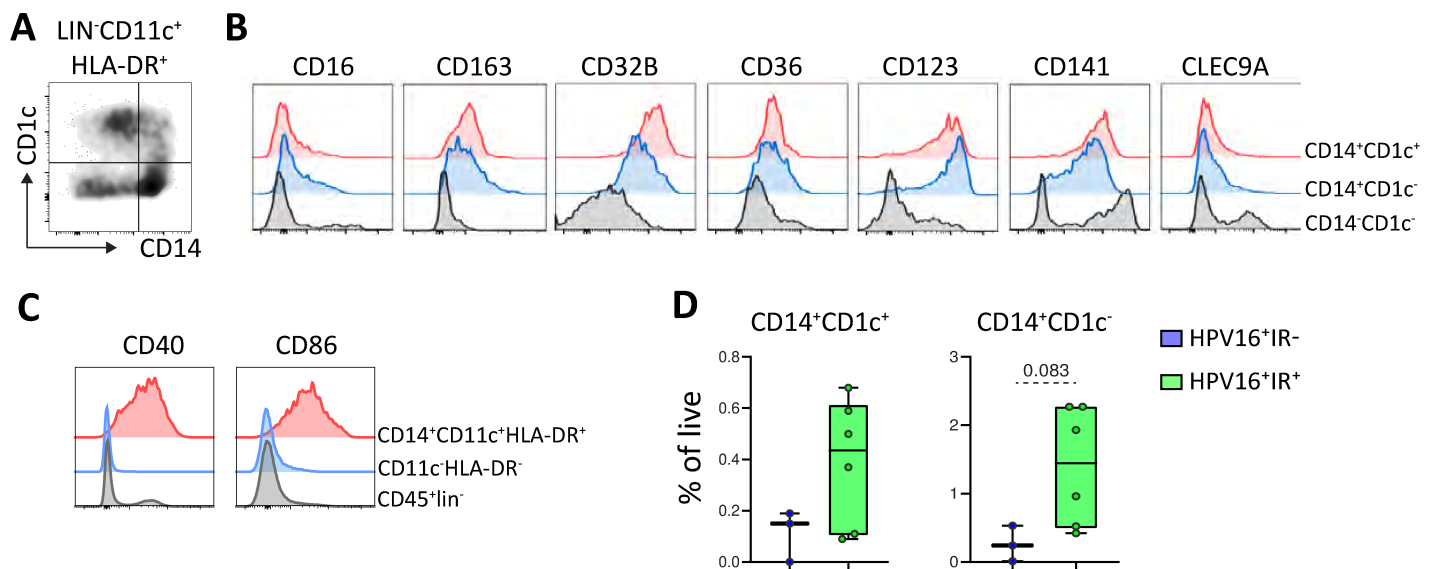

**Supplemental Figure 7. Characterization of CD14<sup>+</sup>CD1c<sup>+</sup> DC and CD14<sup>+</sup>CD1c<sup>-</sup> monocytes/macrophages in the TME of HPV16<sup>+</sup>IR<sup>-</sup> and HPV16<sup>+</sup>IR<sup>+</sup> OPSCC tumors.**

Freshly dissociated OPSCC tumor tissue from 9 HPV16<sup>+</sup> OPSCC patients was analyzed by 13-parameter flow cytometry analysis with antibodies directed against CD3/CD19/CD20/CD56, CD11c, HLA-DR, CD14, CD11b, CD163, CD141, CLEC9A, CD1c, CD16, CD123, CD36 and CD32B. **A, B)** The gating strategy is depicted for a representative OPSCC sample. **A)** Dot plot showing expression of CD14 and CD1c within lineage-negative (LIN<sup>-</sup>), CD11c<sup>+</sup> and HLA-DR<sup>+</sup> myeloid cells. Singlets were gated on FSC-H/FSC-A properties, after which dead cells were excluded through gating on yellow amine reactive dye-negative cells. Next, CD3-CD19-CD20-CD56-HLA-DR<sup>+</sup>CD11c<sup>+</sup> myeloid cells were selected, which were subsequently divided based on CD14 and CD1c expression. **B)** Histogram plots showing CD16, CD163, CD32B, CD36, CD123, CD141 and CLEC9A expression for CD14-CD1c<sup>-</sup> (black), CD14<sup>+</sup>CD1c<sup>-</sup> (blue) and CD14<sup>+</sup>CD1c<sup>+</sup> cells (red). **C)** Histogram plots showing CD40 and CD86 expression for CD45<sup>+</sup>lin<sup>-</sup> (black), CD11c-HLA-DR<sup>-</sup> (blue) and CD14<sup>+</sup>CD11c<sup>+</sup>HLA-DR<sup>+</sup> cells (red). **D)** Box plots depicting the distribution of the identified CD14<sup>+</sup>CD1c<sup>+</sup> DC (left) and CD14<sup>+</sup>CD1c<sup>-</sup> monocytes/macrophages (right) among HPV16<sup>+</sup>IR<sup>-</sup> (blue, n=3) and HPV16<sup>+</sup>IR<sup>+</sup> (green, n=6) OPSCC tumors. Data is represented as percentage of live cells.
