# Supplementary material for: Tumor-specific T cells support chemokine-driven spatial organization of intratumoral immune microaggregates needed for long survival
Source: HighWire-hosted journal article supplement (doi:10.1136/jitc-2021-004346), 2022-02-01
Supplement: jitc-2021-004346supp011_data_supplement.xlsx [file jitc-2021-004346supp011_data_supplement.xlsx]

## Sheet: CD8_0
Supplemental Table 7. Top 30 differentially expressed genes (DEGs) per cluster
gene_symbol	logFC*	logCPM	F	PValue	FDR	cluster
CCL4L2	3.2959	11.9155	1720.98	0	0	clusterT CD8+ 0
CCL4	2.47776	13.3657	1548.15	6.69638e-297	5.60119e-293	clusterT CD8+ 0
CCL3	1.39689	11.1635	376.503	4.73501e-81	1.58424e-77	clusterT CD8+ 0
IFNG	1.38398	11.3077	377.901	2.46315e-81	1.03015e-77	clusterT CD8+ 0
CCL3L1	1.17883	11.0369	282.887	7.73091e-42	1.84758e-38	clusterT CD8+ 0
TNF	1.0111	11.3216	183.308	4.47952e-41	9.36724e-38	clusterT CD8+ 0
GZMK	0.994659	12.1878	521.164	4.73117e-110	2.63826e-106	clusterT CD8+ 0
EGR1	0.769277	11.0847	122.835	1.31311e-22	1.37294e-19	clusterT CD8+ 0
ITM2C	0.758203	11.5071	167.847	3.8972e-33	5.92694e-30	clusterT CD8+ 0
XCL2	0.74061	11.0589	104.285	1.26352e-21	1.24338e-18	clusterT CD8+ 0
TAGAP	0.726776	11.2177	141.74	4.10752e-21	3.81749e-18	clusterT CD8+ 0
KLF6	0.726751	12.5037	284.523	3.31613e-62	9.24593e-59	clusterT CD8+ 0
CRTAM	0.688898	11.0857	107.607	7.06401e-15	4.72695e-12	clusterT CD8+ 0
FOSB	0.67865	11.5186	169.62	2.37059e-34	3.96575e-31	clusterT CD8+ 0
CD69	0.644369	11.9431	132.352	2.88721e-30	4.02501e-27	clusterT CD8+ 0
TNFSF9	0.624902	10.9881	172.448	6.33405e-12	2.64906e-09	clusterT CD8+ 0
GPR183	0.607991	11.1735	88.2629	9.37676e-14	4.75345e-11	clusterT CD8+ 0
DUSP2	0.587173	12.1361	113.237	3.53755e-26	4.22712e-23	clusterT CD8+ 0
RGCC	0.581173	11.5805	70.9737	4.62463e-17	3.36371e-14	clusterT CD8+ 0
DKK3	0.56721	11.0911	117.737	3.73631e-14	2.08349e-11	clusterT CD8+ 0
CLDND1	0.556032	11.32	112.967	4.85832e-17	3.38645e-14	clusterT CD8+ 0
CHI3L2	0.543613	11.0136	136.335	1.87258e-12	8.70176e-10	clusterT CD8+ 0
RNF19A	0.536613	11.1201	85.455	7.44948e-11	2.54331e-08	clusterT CD8+ 0
CST7	0.521613	11.975	191.203	4.36582e-37	8.11509e-34	clusterT CD8+ 0
DUSP1	0.516929	12.4058	117.692	3.92742e-27	5.05399e-24	clusterT CD8+ 0
GZMB	-0.522309	11.3584	2.07586	0.149706	1	clusterT CD8+ 0
LTB	-0.523257	11.3949	28.3258	1.0679e-07	2.44725e-05	clusterT CD8+ 0
KLRC1	-0.645605	10.9754	0.000712642	0.989442	1	clusterT CD8+ 0
CXCL13	-0.759558	11.1237	1.12648	0.351114	1	clusterT CD8+ 0
GNLY	-1.58964	11.6557	11.2725	0.000792256	0.0907784	clusterT CD8+ 0
* Values depicted are log2 fold change (log2FC) values.

## Sheet: CD8_1
gene_symbol	logFC	logCPM	F	PValue	FDR	cluster
GZMK	1.06415	12.1878	573.388	2.44609e-120	4.09206e-116	clusterT CD8+ 1
ITM2C	0.755964	11.5071	144.155	1.0751e-28	3.59708e-25	clusterT CD8+ 1
JUNB	0.720185	12.7661	177.465	7.66481e-40	4.27415e-36	clusterT CD8+ 1
DKK3	0.653818	11.0911	143.505	6.41529e-17	6.70758e-14	clusterT CD8+ 1
CXCR5	0.633239	11.0092	201.036	2.10053e-17	2.50998e-14	clusterT CD8+ 1
DUSP2	0.624066	12.1361	119.276	1.79871e-27	5.01509e-24	clusterT CD8+ 1
LTB	0.623558	11.3949	74.5563	7.71812e-18	1.07597e-14	clusterT CD8+ 1
SOCS3	0.582368	11.0828	78.1229	4.40407e-10	2.30237e-07	clusterT CD8+ 1
PTMS	-0.561836	11.0483	34.5744	0.000220484	0.0315255	clusterT CD8+ 1
KLRB1	-0.572497	11.0172	55.5098	8.72296e-07	0.000217801	clusterT CD8+ 1
HLA-DRB1	-0.59034	11.3765	45.7358	4.14772e-10	2.2383e-07	clusterT CD8+ 1
ZNF683	-0.606441	11.0746	52.7259	2.43286e-07	7.14023e-05	clusterT CD8+ 1
LGALS1	-0.609014	11.0695	41.8124	8.67231e-07	0.000217801	clusterT CD8+ 1
PHLDA1	-0.621537	11.0388	49.302	6.84697e-06	0.00143179	clusterT CD8+ 1
IFNG	-0.646589	11.3077	32.5987	1.19523e-08	4.34673e-06	clusterT CD8+ 1
HOPX	-0.651047	11.0223	54.9713	4.86667e-06	0.00104378	clusterT CD8+ 1
CD7	-0.651736	11.5308	83.9453	1.76537e-18	2.95328e-15	clusterT CD8+ 1
KLRC1	-0.653964	10.9754	-4.13057e-07	1	1	clusterT CD8+ 1
CXCL13	-0.660794	11.1237	0.350809	0.602805	1	clusterT CD8+ 1
HLA-DRA	-0.663259	11.1518	39.299	7.14222e-07	0.000188194	clusterT CD8+ 1
LINC02446	-0.703246	11.0929	8.62036	0.0205584	1	clusterT CD8+ 1
PRF1	-0.736773	11.1684	94.5346	3.59538e-14	3.53806e-11	clusterT CD8+ 1
S100A4	-0.782427	11.4611	74.0774	9.8038e-18	1.2616e-14	clusterT CD8+ 1
GZMH	-0.81819	11.2551	51.186	9.55885e-13	7.9955e-10	clusterT CD8+ 1
KLRD1	-0.896569	11.0484	81.3027	1.16153e-09	5.25168e-07	clusterT CD8+ 1
CCL4L2	-0.938518	11.9155	31.2318	2.40555e-08	8.21275e-06	clusterT CD8+ 1
CCL3	-1.17646	11.1635	76.4879	2.94236e-18	4.4748e-15	clusterT CD8+ 1
GZMB	-1.66854	11.3584	54.7692	1.57061e-13	1.45971e-10	clusterT CD8+ 1
CCL4	-1.75858	13.3657	304.286	2.77817e-66	2.3238e-62	clusterT CD8+ 1
GNLY	-2.67377	11.6557	21.94	2.8842e-06	0.000652025	clusterT CD8+ 1

## Sheet: CD8_2
gene_symbol	logFC	logCPM	F	PValue	FDR	cluster
CCL4L2	2.43067	11.9155	264.632	4.36287e-58	1.82466e-54	clusterT CD8+ 2
CCL4	2.20739	13.3657	479.846	7.60364e-102	1.27201e-97	clusterT CD8+ 2
TNF	1.9727	11.3216	354.826	1.2228e-76	6.81872e-73	clusterT CD8+ 2
GZMK	1.12054	12.1878	383.109	2.15939e-82	1.80622e-78	clusterT CD8+ 2
LTB	0.890413	11.3949	105.112	1.96159e-24	5.46925e-21	clusterT CD8+ 2
KLF2	0.75309	11.239	70.0672	3.53104e-16	5.90707e-13	clusterT CD8+ 2
ITM2C	0.737351	11.5071	75.5466	8.59063e-16	1.30648e-12	clusterT CD8+ 2
DENND2D	0.730683	11.1828	86.9508	4.29897e-11	3.12684e-08	clusterT CD8+ 2
DKK3	0.727995	11.0911	117.109	4.3626e-14	4.29305e-11	clusterT CD8+ 2
TAGAP	0.714785	11.2177	71.5102	2.11335e-11	1.68354e-08	clusterT CD8+ 2
TXNIP	0.685692	11.2746	74.2579	2.15889e-13	1.90085e-10	clusterT CD8+ 2
EGR1	0.673473	11.0847	43.0458	6.95286e-09	3.32327e-06	clusterT CD8+ 2
SELL	0.652621	11.1497	66.6727	6.47946e-10	3.87125e-07	clusterT CD8+ 2
KLRC1	-0.672199	10.9754	-1.29463e-09	1	1	clusterT CD8+ 2
HOPX	-0.711576	11.0223	48.2537	1.85138e-05	0.00483934	clusterT CD8+ 2
LINC02446	-0.732633	11.0929	17.7188	0.000898868	0.133782	clusterT CD8+ 2
CXCL13	-0.732802	11.1237	12.7707	0.00169363	0.216281	clusterT CD8+ 2
LGALS1	-0.741751	11.0695	34.8924	6.98679e-06	0.00205056	clusterT CD8+ 2
PTMS	-0.779783	11.0483	68.5965	1.95441e-07	7.60358e-05	clusterT CD8+ 2
ID2	-0.818406	11.1478	52.8483	1.82359e-08	8.02812e-06	clusterT CD8+ 2
LAG3	-0.868243	11.2252	51.7135	2.01067e-09	1.01929e-06	clusterT CD8+ 2
HLA-DRA	-0.87512	11.1518	46.1026	7.89855e-08	3.2228e-05	clusterT CD8+ 2
PRF1	-0.953155	11.1684	72.5998	3.17708e-11	2.41588e-08	clusterT CD8+ 2
CD7	-0.95377	11.5308	73.9498	1.83405e-16	3.4091e-13	clusterT CD8+ 2
HLA-DRB1	-1.09003	11.3765	73.257	2.61878e-15	3.36996e-12	clusterT CD8+ 2
KLRD1	-1.1437	11.0484	128.543	1.98134e-14	2.20973e-11	clusterT CD8+ 2
GZMH	-1.23986	11.2551	63.469	1.9831e-15	2.76461e-12	clusterT CD8+ 2
S100A4	-1.41397	11.4611	103.261	4.90124e-24	1.17133e-20	clusterT CD8+ 2
GZMB	-1.84826	11.3584	85.8989	2.70456e-20	5.65557e-17	clusterT CD8+ 2
GNLY	-2.40275	11.6557	42.33	8.42806e-11	5.42281e-08	clusterT CD8+ 2

## Sheet: CD8_3
gene_symbol	logFC	logCPM	F	PValue	FDR	cluster
CXCL13	3.46294	11.1237	3374.09	0	0	clusterT CD8+ 3
GZMB	2.29993	11.3584	1552.54	1.23185e-297	1.03038e-293	clusterT CD8+ 3
KRT86	2.22755	10.9728	2337.5	1.258e-121	2.10451e-118	clusterT CD8+ 3
GNLY	2.15381	11.6557	700.447	5.60908e-145	1.56391e-141	clusterT CD8+ 3
CCL3	1.88892	11.1635	558.776	1.80715e-117	2.74835e-114	clusterT CD8+ 3
ALOX5AP	1.80448	11.2247	1072.18	1.03759e-154	5.78594e-151	clusterT CD8+ 3
PHLDA1	1.79667	11.0388	1119.15	6.63585e-102	7.92937e-99	clusterT CD8+ 3
HLA-DRA	1.75341	11.1518	912.994	3.41483e-126	6.34741e-123	clusterT CD8+ 3
LINC02446	1.68603	11.0929	660.315	2.34974e-91	2.62059e-88	clusterT CD8+ 3
KLRB1	1.66486	11.0172	767.55	1.00405e-74	9.88048e-72	clusterT CD8+ 3
ENTPD1	1.6224	10.9591	2986.13	3.27362e-81	3.42277e-78	clusterT CD8+ 3
RGS1	1.60254	11.4458	611.736	7.84778e-128	1.64107e-124	clusterT CD8+ 3
CSF1	1.54644	10.9753	1037.87	4.12962e-60	3.1402e-57	clusterT CD8+ 3
ITGAE	1.53816	11.0952	684.755	8.44624e-71	7.84984e-68	clusterT CD8+ 3
HLA-DRB1	1.52128	11.3765	765.482	3.87454e-144	9.2596e-141	clusterT CD8+ 3
KLRC1	1.41885	10.9754	985.922	1.27021e-54	7.87013e-52	clusterT CD8+ 3
HLA-DQA1	1.37962	11.0495	669.389	1.84611e-57	1.28681e-54	clusterT CD8+ 3
GPR25	1.36647	10.9604	1696.33	4.56366e-52	2.54485e-49	clusterT CD8+ 3
CD7	1.35523	11.5308	719.142	2.30363e-145	7.70748e-142	clusterT CD8+ 3
ACP5	1.33468	10.9927	687.486	4.00146e-41	1.45523e-38	clusterT CD8+ 3
ZNF683	1.33018	11.0746	477.992	1.71975e-54	1.02749e-51	clusterT CD8+ 3
TNFRSF9	1.32863	10.9688	1002.48	5.51386e-47	2.63547e-44	clusterT CD8+ 3
CXCR6	1.32227	11.0072	494.712	1.05101e-38	3.44753e-36	clusterT CD8+ 3
RBPJ	1.31567	11.008	607.611	1.18085e-41	4.59404e-39	clusterT CD8+ 3
TIGIT	1.30744	11.1363	485.492	1.66593e-57	1.21171e-54	clusterT CD8+ 3
HLA-DRB5	1.29742	11.1123	544.358	1.41614e-55	9.11179e-53	clusterT CD8+ 3
CTLA4	1.28665	10.9648	1107.45	5.47286e-42	2.23306e-39	clusterT CD8+ 3
HAVCR2	1.26132	10.959	1251.01	2.70137e-44	1.18924e-41	clusterT CD8+ 3
KLRG1	-1.43919	11.0711	305.976	1.47622e-31	4.11596e-29	clusterT CD8+ 3
GZMK	-2.56936	12.1878	342.921	2.02523e-68	1.78316e-65	clusterT CD8+ 3

## Sheet: CD8_4
gene_symbol	logFC	logCPM	F	PValue	FDR	cluster
RGCC	1.10935	11.5805	241.237	3.19891e-53	2.67573e-49	clusterT CD8+ 4
ZNF331	0.948974	11.1776	172.871	8.4286e-28	1.41002e-24	clusterT CD8+ 4
TUBA4A	0.874031	11.3648	184.279	2.15481e-35	5.14968e-32	clusterT CD8+ 4
YPEL5	0.861671	11.3011	180.532	1.70497e-29	3.16915e-26	clusterT CD8+ 4
GZMK	0.857475	12.1878	291.647	1.11993e-63	1.87352e-59	clusterT CD8+ 4
LMNA	0.817177	11.1366	158.23	4.39791e-25	5.65943e-22	clusterT CD8+ 4
DUSP4	0.792392	11.3772	129.779	1.51087e-26	2.10628e-23	clusterT CD8+ 4
DUSP2	0.783234	12.1361	162.493	1.12619e-36	3.76799e-33	clusterT CD8+ 4
ITM2C	0.689171	11.5071	110.66	2.08982e-22	2.19983e-19	clusterT CD8+ 4
NR4A2	0.66791	11.3342	98.1514	3.25471e-20	3.20283e-17	clusterT CD8+ 4
DNAJB1	0.659956	11.6788	95.6742	2.10397e-22	2.19983e-19	clusterT CD8+ 4
TNFAIP3	0.631124	11.9484	136.808	3.23674e-31	6.76843e-28	clusterT CD8+ 4
BTG1	0.629708	12.5956	221.361	4.5312e-49	2.52675e-45	clusterT CD8+ 4
MYADM	0.62683	11.1487	95.6342	5.7614e-14	4.01593e-11	clusterT CD8+ 4
ZFP36	0.626184	12.4281	117.907	3.53217e-27	5.37179e-24	clusterT CD8+ 4
PIK3R1	0.616542	11.1521	82.3961	7.71665e-12	4.45144e-09	clusterT CD8+ 4
CRTAM	0.601254	11.0857	61.3472	4.18203e-09	1.70637e-06	clusterT CD8+ 4
CST7	0.592687	11.975	183.911	9.78417e-36	2.72799e-32	clusterT CD8+ 4
DKK3	0.577485	11.0911	94.044	1.32897e-11	6.94759e-09	clusterT CD8+ 4
PHLDA1	-0.564686	11.0388	17.9774	0.00660003	0.525718	clusterT CD8+ 4
PIM1	-0.582514	11.09	51.8584	2.22445e-07	6.59717e-05	clusterT CD8+ 4
XCL1	-0.669566	11.0494	21.521	4.92755e-05	0.00958524	clusterT CD8+ 4
IFNG	-0.731437	11.3077	30.9801	2.73649e-08	9.53724e-06	clusterT CD8+ 4
TNF	-0.906251	11.3216	46.0016	1.31198e-11	6.94759e-09	clusterT CD8+ 4
CXCL13	-1.06057	11.1237	7.11943	0.0182799	1	clusterT CD8+ 4
CCL4L2	-1.09998	11.9155	30.9298	2.80792e-08	9.58648e-06	clusterT CD8+ 4
CCL3	-1.11548	11.1635	51.4409	8.40529e-13	5.02186e-10	clusterT CD8+ 4
GZMB	-1.14519	11.3584	25.436	4.72728e-07	0.000129644	clusterT CD8+ 4
CCL4	-1.37385	13.3657	167.266	1.09872e-37	4.59512e-34	clusterT CD8+ 4
GNLY	-1.39506	11.6557	8.09938	0.00444523	0.395554	clusterT CD8+ 4

## Sheet: CD8_5
gene_symbol	logFC	logCPM	F	PValue	FDR	cluster
IL7R	2.03182	11.3033	890.682	4.87861e-172	8.16143e-168	clusterT CD8+ 5
GNLY	1.62177	11.6557	285.023	2.61391e-62	2.91521e-59	clusterT CD8+ 5
XCL1	1.52289	11.0494	370.836	1.06054e-63	1.47848e-60	clusterT CD8+ 5
FOS	1.45693	12.9177	679.54	5.83796e-141	1.95326e-137	clusterT CD8+ 5
ZFP36L2	1.37399	12.3994	737.527	4.55772e-152	3.81231e-148	clusterT CD8+ 5
TSC22D3	1.35493	12.1751	692.926	1.55742e-143	6.5135e-140	clusterT CD8+ 5
TNFAIP3	1.34003	11.9484	696.361	3.40999e-144	1.90152e-140	clusterT CD8+ 5
NFKBIA	1.31	11.5162	449.245	9.95149e-96	1.84976e-92	clusterT CD8+ 5
ZFP36	1.22032	12.4281	497.505	2.32548e-105	5.55755e-102	clusterT CD8+ 5
ZNF683	1.20233	11.0746	359.272	2.138e-41	1.49028e-38	clusterT CD8+ 5
DUSP1	1.19259	12.4058	536.52	4.37059e-113	1.21859e-109	clusterT CD8+ 5
LMNA	1.16534	11.1366	287.362	3.544e-44	2.69489e-41	clusterT CD8+ 5
JUN	1.15648	13.1682	454.074	1.07232e-96	2.24236e-93	clusterT CD8+ 5
PHLDA1	1.14997	11.0388	431.31	2.15688e-40	1.4433e-37	clusterT CD8+ 5
KLRB1	1.12364	11.0172	335.165	1.25517e-33	6.5618e-31	clusterT CD8+ 5
CD69	1.10218	11.9431	311.056	1.12408e-67	1.70952e-64	clusterT CD8+ 5
PTGER4	1.04792	11.1858	248.016	2.56577e-36	1.53296e-33	clusterT CD8+ 5
XCL2	1.04275	11.0589	146.028	1.25095e-29	5.50712e-27	clusterT CD8+ 5
FOSB	1.03309	11.5186	320.286	2.66517e-63	3.42966e-60	clusterT CD8+ 5
HOPX	1.02433	11.0223	366.608	3.76211e-32	1.85107e-29	clusterT CD8+ 5
KLF6	1.02259	12.5037	438.907	1.18037e-93	1.97464e-90	clusterT CD8+ 5
NR4A1	1.01264	11.0473	180.081	9.45876e-24	3.76751e-21	clusterT CD8+ 5
CITED2	1.00055	11.2478	159.844	5.2718e-35	3.0411e-32	clusterT CD8+ 5
ANXA1	0.996426	11.4764	221.692	3.86365e-49	3.23175e-46	clusterT CD8+ 5
LTB	0.99631	11.3949	149.184	7.51816e-34	4.05714e-31	clusterT CD8+ 5
CD74	-0.993104	12.4863	225.991	4.87284e-50	4.29041e-47	clusterT CD8+ 5
GZMK	-1.03183	12.1878	107.828	5.80016e-23	2.25653e-20	clusterT CD8+ 5
GZMA	-1.04637	11.8397	206.398	6.19984e-46	4.93891e-43	clusterT CD8+ 5
CST7	-1.10192	11.975	325.071	6.50458e-60	6.80094e-57	clusterT CD8+ 5
GZMH	-1.1062	11.2551	77.8386	1.49969e-18	5.22672e-16	clusterT CD8+ 5

## Sheet: CD8-6
gene_symbol	logFC	logCPM	F	PValue	FDR	cluster
IFI6	1.74645	11.1269	439.564	3.04219e-60	2.54464e-56	clusterT CD8+ 6
ACTA1	1.70304	10.9367	126.235	2.91639e-05	0.00393454	clusterT CD8+ 6
ISG15	1.68363	11.1382	409.048	1.23231e-56	5.15382e-53	clusterT CD8+ 6
MX1	1.49478	11.0684	349.685	4.24956e-37	7.10908e-34	clusterT CD8+ 6
ISG20	1.41447	11.2779	353.611	1.44281e-49	4.82736e-46	clusterT CD8+ 6
IFIT3	1.38585	10.9613	670.397	9.36839e-26	1.20557e-22	clusterT CD8+ 6
IFIT2	1.32093	10.9519	606.094	3.7361e-24	4.46437e-21	clusterT CD8+ 6
GZMH	1.30497	11.2551	218.583	1.72835e-48	4.81891e-45	clusterT CD8+ 6
LY6E	1.28641	11.4345	367.941	6.20325e-58	3.45914e-54	clusterT CD8+ 6
OAS1	1.21394	10.996	342.08	9.82161e-22	9.66504e-19	clusterT CD8+ 6
MX2	1.20158	10.9899	253.128	2.43598e-17	1.50931e-14	clusterT CD8+ 6
GZMB	1.13214	11.3584	146.385	2.95882e-33	4.49983e-30	clusterT CD8+ 6
OASL	1.11079	11.0745	193.656	3.38631e-19	3.1472e-16	clusterT CD8+ 6
GZMK	1.0973	12.1878	283.561	5.24092e-62	8.76753e-58	clusterT CD8+ 6
CMPK2	1.09654	10.9635	371.083	7.41993e-17	4.43314e-14	clusterT CD8+ 6
PLSCR1	1.07424	11.0139	236.979	5.967e-18	3.83931e-15	clusterT CD8+ 6
HLA-DRA	1.05761	11.1518	193.204	4.16581e-28	5.80749e-25	clusterT CD8+ 6
TRIM22	1.05027	11.0854	151.486	3.778e-16	1.97507e-13	clusterT CD8+ 6
IFNG	1.03615	11.3077	98.8087	4.4471e-23	4.64972e-20	clusterT CD8+ 6
STAT1	1.02837	11.0827	141.372	1.65756e-16	9.2431e-14	clusterT CD8+ 6
HLA-DRB1	1.02575	11.3765	195.46	3.57057e-38	6.6369e-35	clusterT CD8+ 6
CD38	1.00778	10.9681	487.87	5.58397e-19	4.59856e-16	clusterT CD8+ 6
LAG3	1.00464	11.2252	142.677	2.25278e-23	2.51246e-20	clusterT CD8+ 6
RSAD2	0.980776	10.9589	305.511	3.24618e-13	1.18055e-10	clusterT CD8+ 6
IRF7	0.975908	11.0589	140.499	1.93853e-14	9.00824e-12	clusterT CD8+ 6
SAMD9L	0.934159	11.0012	162.774	5.47082e-12	1.83043e-09	clusterT CD8+ 6
AREG	-1.07145	11.0016	80.1329	1.05932e-08	2.36284e-06	clusterT CD8+ 6
XCL1	-1.23167	11.0494	50.7109	4.64244e-10	1.27317e-07	clusterT CD8+ 6
XCL2	-1.28766	11.0589	65.0729	4.48942e-14	1.97641e-11	clusterT CD8+ 6
IL7R	-1.37424	11.3033	53.017	9.00358e-12	2.89655e-09	clusterT CD8+ 6

## Sheet: CD8_7
gene_symbol	logFC	logCPM	F	PValue	FDR	cluster
ZFP36L2	1.63339	12.3994	898.245	2.7104e-182	4.53422e-178	clusterT CD8+ 7
LTB	1.6243	11.3949	413.587	1.47345e-88	4.10822e-85	clusterT CD8+ 7
IL7R	1.59521	11.3033	393.392	4.47917e-77	9.3665e-74	clusterT CD8+ 7
ZFP36	1.27371	12.4281	439.983	7.17684e-94	4.00204e-90	clusterT CD8+ 7
XCL1	1.25283	11.0494	232.571	1.29306e-40	1.1385e-37	clusterT CD8+ 7
LMNA	1.22999	11.1366	256.552	1.25588e-39	1.05048e-36	clusterT CD8+ 7
CD7	1.21025	11.5308	393.233	2.28291e-80	5.45584e-77	clusterT CD8+ 7
DDIT4	1.16176	11.2225	231.133	1.47419e-42	1.37009e-39	clusterT CD8+ 7
S100A4	1.08952	11.4611	304.219	2.86838e-66	5.33169e-63	clusterT CD8+ 7
AREG	1.06882	11.0016	216.19	5.62471e-21	2.09102e-18	clusterT CD8+ 7
NFKBIA	1.06439	11.5162	220.16	8.08316e-49	1.04018e-45	clusterT CD8+ 7
C1orf162	1.04027	10.9602	539.468	2.26812e-20	8.23418e-18	clusterT CD8+ 7
HOPX	1.02381	11.0223	308.116	2.74882e-27	1.43703e-24	clusterT CD8+ 7
ZNF683	1.02239	11.0746	248.223	3.98483e-29	2.3808e-26	clusterT CD8+ 7
CDKN1A	1.01502	10.9929	272.203	2.31339e-20	8.23418e-18	clusterT CD8+ 7
FOS	0.997233	12.9177	229.899	7.42837e-51	1.03558e-47	clusterT CD8+ 7
CCR7	0.979969	11.0928	153.175	7.81455e-20	2.66795e-17	clusterT CD8+ 7
GZMA	-0.97775	11.8397	158.067	9.77429e-36	7.78638e-33	clusterT CD8+ 7
TIGIT	-0.989192	11.1363	112.121	1.57803e-14	4.19031e-12	clusterT CD8+ 7
HLA-DPB1	-1.00485	11.2752	129.68	1.49033e-17	4.617e-15	clusterT CD8+ 7
CXCL13	-1.02536	11.1237	8.85737	0.00904877	0.319612	clusterT CD8+ 7
HSPA1A	-1.14785	11.2644	17.4109	3.05972e-05	0.00242588	clusterT CD8+ 7
HLA-DPA1	-1.17228	11.3397	192	3.67302e-26	1.7556e-23	clusterT CD8+ 7
HLA-DRB5	-1.18959	11.1123	150.443	1.51047e-16	4.43311e-14	clusterT CD8+ 7
HLA-DRA	-1.29755	11.1518	110.874	8.29644e-17	2.52348e-14	clusterT CD8+ 7
HLA-DRB1	-1.33795	11.3765	157.674	4.03374e-31	2.93394e-28	clusterT CD8+ 7
CCL3	-1.4648	11.1635	74.9861	6.22721e-18	2.00337e-15	clusterT CD8+ 7
GZMH	-1.54579	11.2551	130.898	5.89771e-30	3.65418e-27	clusterT CD8+ 7
CCL4L2	-2.80063	11.9155	114.635	1.77413e-26	8.99375e-24	clusterT CD8+ 7
CCL4	-3.11765	13.3657	423.876	1.24313e-90	4.15926e-87	clusterT CD8+ 7

## Sheet: CD8_8
gene_symbol	logFC	logCPM	F	PValue	FDR	cluster
DUSP4	1.09799	11.3772	229.937	9.973e-46	8.34192e-42	clusterT CD8+ 8
GZMK	1.03659	12.1878	307.367	6.45037e-67	1.07908e-62	clusterT CD8+ 8
GPR183	1.00921	11.1735	129.907	1.60224e-19	2.43671e-16	clusterT CD8+ 8
CREM	0.93345	11.0858	158.927	4.08486e-19	5.69464e-16	clusterT CD8+ 8
ITM2C	0.873528	11.5071	129.241	6.75847e-26	1.88437e-22	clusterT CD8+ 8
ZNF331	0.862711	11.1776	114.228	6.47492e-19	8.33223e-16	clusterT CD8+ 8
DUSP2	0.818279	12.1361	140.008	6.73584e-32	2.25368e-28	clusterT CD8+ 8
TUBA4A	0.783014	11.3648	106.408	3.93339e-21	8.22522e-18	clusterT CD8+ 8
CST7	0.727937	11.975	187.043	2.54347e-36	1.06374e-32	clusterT CD8+ 8
YPEL5	0.714756	11.3011	83.7953	1.55551e-14	1.62638e-11	clusterT CD8+ 8
PIK3R1	0.698483	11.1521	69.9214	2.89386e-10	1.79301e-07	clusterT CD8+ 8
DKK3	0.690813	11.0911	91.9982	2.20904e-11	1.67977e-08	clusterT CD8+ 8
NR4A1	-0.684929	11.0473	22.3715	0.000398301	0.0673049	clusterT CD8+ 8
LINC02446	-0.73336	11.0929	2.14623	0.247828	1	clusterT CD8+ 8
HSPA6	-0.753002	10.9967	30.6101	0.000957429	0.136896	clusterT CD8+ 8
CCL4L2	-0.776482	11.9155	11.8405	0.000584093	0.092182	clusterT CD8+ 8
STMN1	-0.813297	11.0322	39.9572	0.000387119	0.0660828	clusterT CD8+ 8
FOS	-0.840141	12.9177	84.0228	6.88002e-20	1.15096e-16	clusterT CD8+ 8
EGR1	-0.846008	11.0847	41.1377	1.49384e-08	6.57644e-06	clusterT CD8+ 8
IFNG	-0.896117	11.3077	29.6887	5.30486e-08	2.11298e-05	clusterT CD8+ 8
NFKBIA	-0.946818	11.5162	70.5191	5.80542e-17	6.47459e-14	clusterT CD8+ 8
CCL3	-1.03458	11.1635	24.0912	9.46624e-07	0.000298794	clusterT CD8+ 8
CXCL13	-1.0414	11.1237	7.33019	0.0173905	1	clusterT CD8+ 8
PHLDA1	-1.05088	11.0388	43.18	2.55542e-05	0.00575305	clusterT CD8+ 8
KRT86	-1.05434	10.9728	0.00148312	0.985096	1	clusterT CD8+ 8
KLRB1	-1.15497	11.0172	91.2062	2.88941e-10	1.79301e-07	clusterT CD8+ 8
TNF	-1.16637	11.3216	42.0663	9.6342e-11	6.71544e-08	clusterT CD8+ 8
JUN	-1.1771	13.1682	179.861	2.39013e-40	1.33282e-36	clusterT CD8+ 8
HSPA1A	-1.25844	11.2644	20.1301	7.38989e-06	0.00193165	clusterT CD8+ 8
HSPA1B	-1.31222	11.1236	73.9624	6.2975e-11	4.58047e-08	clusterT CD8+ 8

## Sheet: CD8_9
gene_symbol	logFC	logCPM	F	PValue	FDR	cluster
HSPA1A	4.26796	11.2644	3622.57	0	0	clusterT CD8+ 9
HSPA1B	3.72648	11.1236	3204.85	0	0	clusterT CD8+ 9
HSPA6	3.6647	10.9967	2830.65	2.18414e-221	1.21795e-217	clusterT CD8+ 9
DNAJB1	1.52849	11.6788	456.827	3.01437e-97	1.26068e-93	clusterT CD8+ 9
LTB	0.962792	11.3949	85.3882	3.48687e-20	3.0701e-17	clusterT CD8+ 9
HSPH1	0.938382	11.0159	137.746	1.18257e-12	5.99491e-10	clusterT CD8+ 9
GIMAP7	0.924211	11.1999	131.808	6.49638e-18	4.72513e-15	clusterT CD8+ 9
HSPB1	0.915231	11.0323	129.735	1.89881e-12	9.07578e-10	clusterT CD8+ 9
TXNIP	0.894755	11.2746	113.397	1.20695e-19	1.00955e-16	clusterT CD8+ 9
CCL3	-0.902952	11.1635	16.0827	6.14782e-05	0.0106028	clusterT CD8+ 9
CSRNP1	-0.916918	11.2274	69.2186	1.60208e-10	6.23283e-08	clusterT CD8+ 9
MCL1	-0.995372	11.4886	101.619	2.02091e-18	1.6099e-15	clusterT CD8+ 9
BTG1	-1.01128	12.5956	226.904	3.13861e-50	1.05012e-46	clusterT CD8+ 9
TENT5C	-1.04694	11.1387	90.4155	6.29818e-12	2.77269e-09	clusterT CD8+ 9
KLF2	-1.0713	11.239	53.422	1.08341e-12	5.66388e-10	clusterT CD8+ 9
YPEL5	-1.10134	11.3011	87.4737	4.17455e-15	2.79344e-12	clusterT CD8+ 9
LMNA	-1.10258	11.1366	67.6393	1.34447e-11	5.6229e-09	clusterT CD8+ 9
RGS1	-1.10957	11.4458	21.8875	2.96383e-06	0.000698337	clusterT CD8+ 9
ZFP36L2	-1.10974	12.3994	143.723	1.0901e-32	1.56758e-29	clusterT CD8+ 9
CREM	-1.23169	11.0858	107.73	1.89513e-13	1.17421e-10	clusterT CD8+ 9
CXCR4	-1.34739	11.8326	207.071	4.47897e-46	1.07041e-42	clusterT CD8+ 9
ZNF331	-1.38878	11.1776	108.926	4.14389e-18	3.15105e-15	clusterT CD8+ 9
CCL4	-1.40926	13.3657	89.9699	3.57277e-21	3.51582e-18	clusterT CD8+ 9
RGCC	-1.40998	11.5805	87.827	1.03657e-20	9.63374e-18	clusterT CD8+ 9
DUSP2	-1.44666	12.1361	183.34	4.40985e-41	7.37724e-38	clusterT CD8+ 9
DUSP4	-1.47679	11.3772	3.55026e-06	0.998602	1	clusterT CD8+ 9
NR4A2	-1.51276	11.3342	126.199	1.57147e-25	2.02224e-22	clusterT CD8+ 9
ZFP36	-1.539	12.4281	201.196	7.67513e-45	1.42664e-41	clusterT CD8+ 9
TSC22D3	-1.5654	12.1751	218.663	1.66344e-48	4.63793e-45	clusterT CD8+ 9
TNFAIP3	-1.61956	11.9484	203.804	2.17298e-45	4.54398e-42	clusterT CD8+ 9

[truncated: 28 more sheets: CD8_10, CD8_11, CD4_0, CD4_1, CD4_2, CD4_3, CD4_4, CD4_5, CD4_6, CD4_7, CD4_8, CD4_9, CD4_10, TREG_0, TREG_1, TREG_2, TREG_3, TREG_4, TREG_5, Tother_0 …]
