# Supplementary material for: Tumor-specific T cells support chemokine-driven spatial organization of intratumoral immune microaggregates needed for long survival
Source: HighWire-hosted journal article supplement (doi:10.1136/jitc-2021-004346), 2022-02-01
Supplement: jitc-2021-004346supp012_data_supplement.pdf [file jitc-2021-004346supp012_data_supplement.pdf]

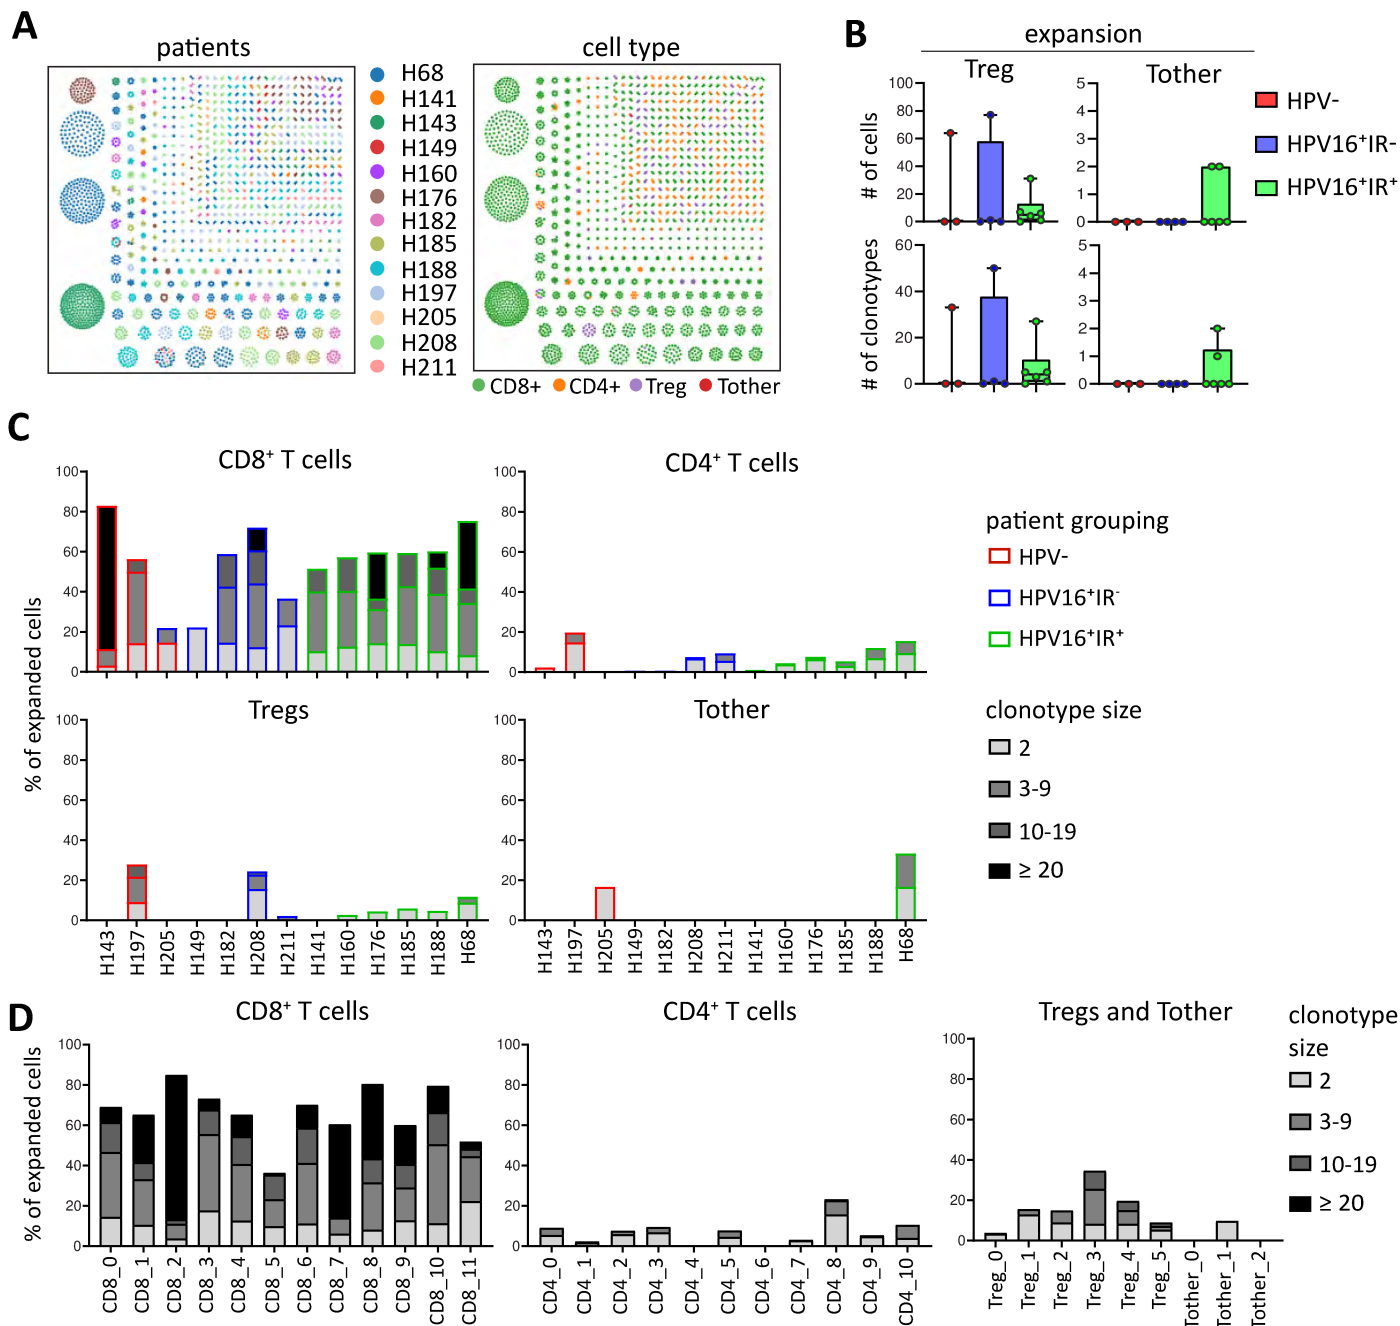

**Supplemental Figure 10.** Clonotype size among individual OPSCC and T cell clusters. Magnetic-bead sorted CD3<sup>+</sup> T cells and CD56<sup>+</sup> NK cells from 13 OPSCC samples were analyzed by integrated single-cell transcriptome and TCR repertoire RNA sequencing analysis. A) Graphs depicting the expanded clonotype clusters, colored by patient (left) and cell type (right). B) Box plots displaying the number of expanded cells (top) and clonotypes (bottom) within Tregs (left) and Tother (right) cells detected in HPV- (red, n=3), HPV16+IR- (blue, n=4) and HPV16+IR+ (green, n=6) OPSCC patients. C, D) Graphs depicting the clonotype size of the expanded TCR in CD8<sup>+</sup> T cells, CD4<sup>+</sup> T cells, Treg and Tother cells per patient (C) and per cluster (D). Data is given as percentage of expanded CD8, CD4, Treg or Tother cells. Colored outline indicates the HPV- and immune response status (HPV- (red, n=3), HPV16+IR- (blue, n=4) and
