# Supplementary material for: Tumor-specific T cells support chemokine-driven spatial organization of intratumoral immune microaggregates needed for long survival
Source: HighWire-hosted journal article supplement (doi:10.1136/jitc-2021-004346), 2022-02-01
Supplement: jitc-2021-004346supp018_data_supplement.pdf [file jitc-2021-004346supp018_data_supplement.pdf]

## Tumor specific T cells support chemokine-driven spatial organization of intratumoral immune microaggregates needed for long survival

Ziena Abdulrahman, Saskia J. Santegoets, Gregor Sturm, Pornpimol Charoentong, Marieke E. Ijsselsteijn, Antonios Somarakis, Thomas Höllt, Francesca Finotello, Zlatko Trajanoski, Sylvia L. van Egmond, Dana A.M. Mustafa, Marij J.P. Welters<sup>#</sup>, Noel F.C.C. de Miranda<sup>#</sup>, Sjoerd H. van der Burg

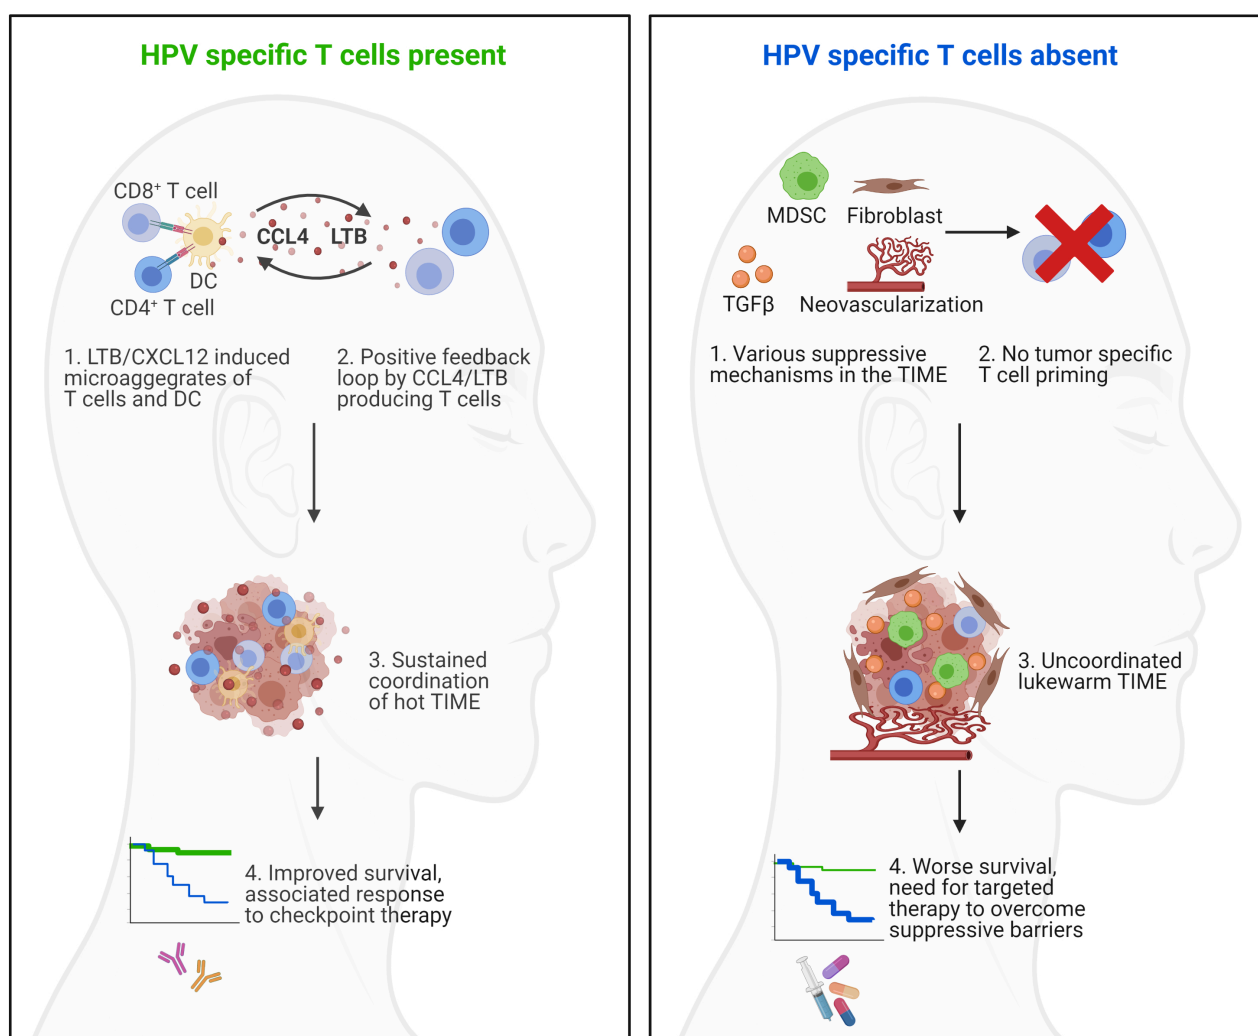

### Key findings:

- A specific spatial phenotypic signature (SPS) portrays long surviving oropharyngeal cancer patients
  - The SPS consists of intratumoral T cell and dendritic cell microaggregates
  - Chemokines produced by tumor-specific T cells sustain the orchestration of the SPS
  - Patients lacking this SPS express multiple targetable immunosuppressive mechanisms
